# Supplementary material
Source: Springer Nature journal article supplement (https://www.springermedizin.de/resource/supplementary/13737_2012_16_MOESM1_ESM.pdf/9682082)

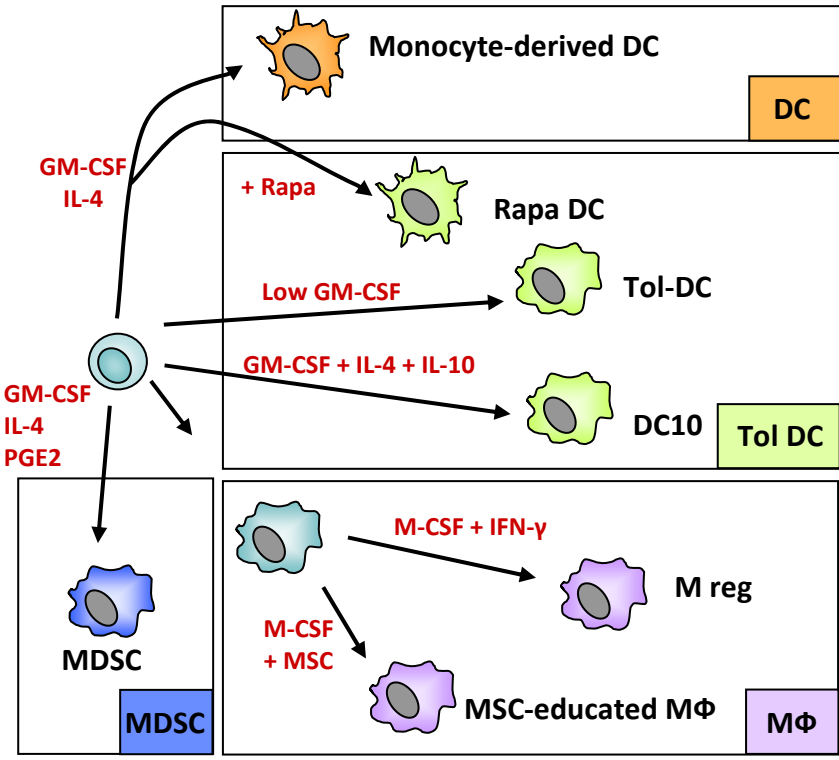

Supplement: MOESM1 [file 9682082]
